# Supplementary material for: #Vape: Measuring E-Cigarette Influence on Instagram With Deep Learning and Text Analysis
Source: PubMed Central journal article supplement (PMC8883232; doi:10.3389/fcomm.2019.00075), 2020-01-22
Supplement: NIHMS1776832-supplement-Supplementary_Figure4.pdf [file NIHMS1776832-supplement-Supplementary_Figure4.pdf]

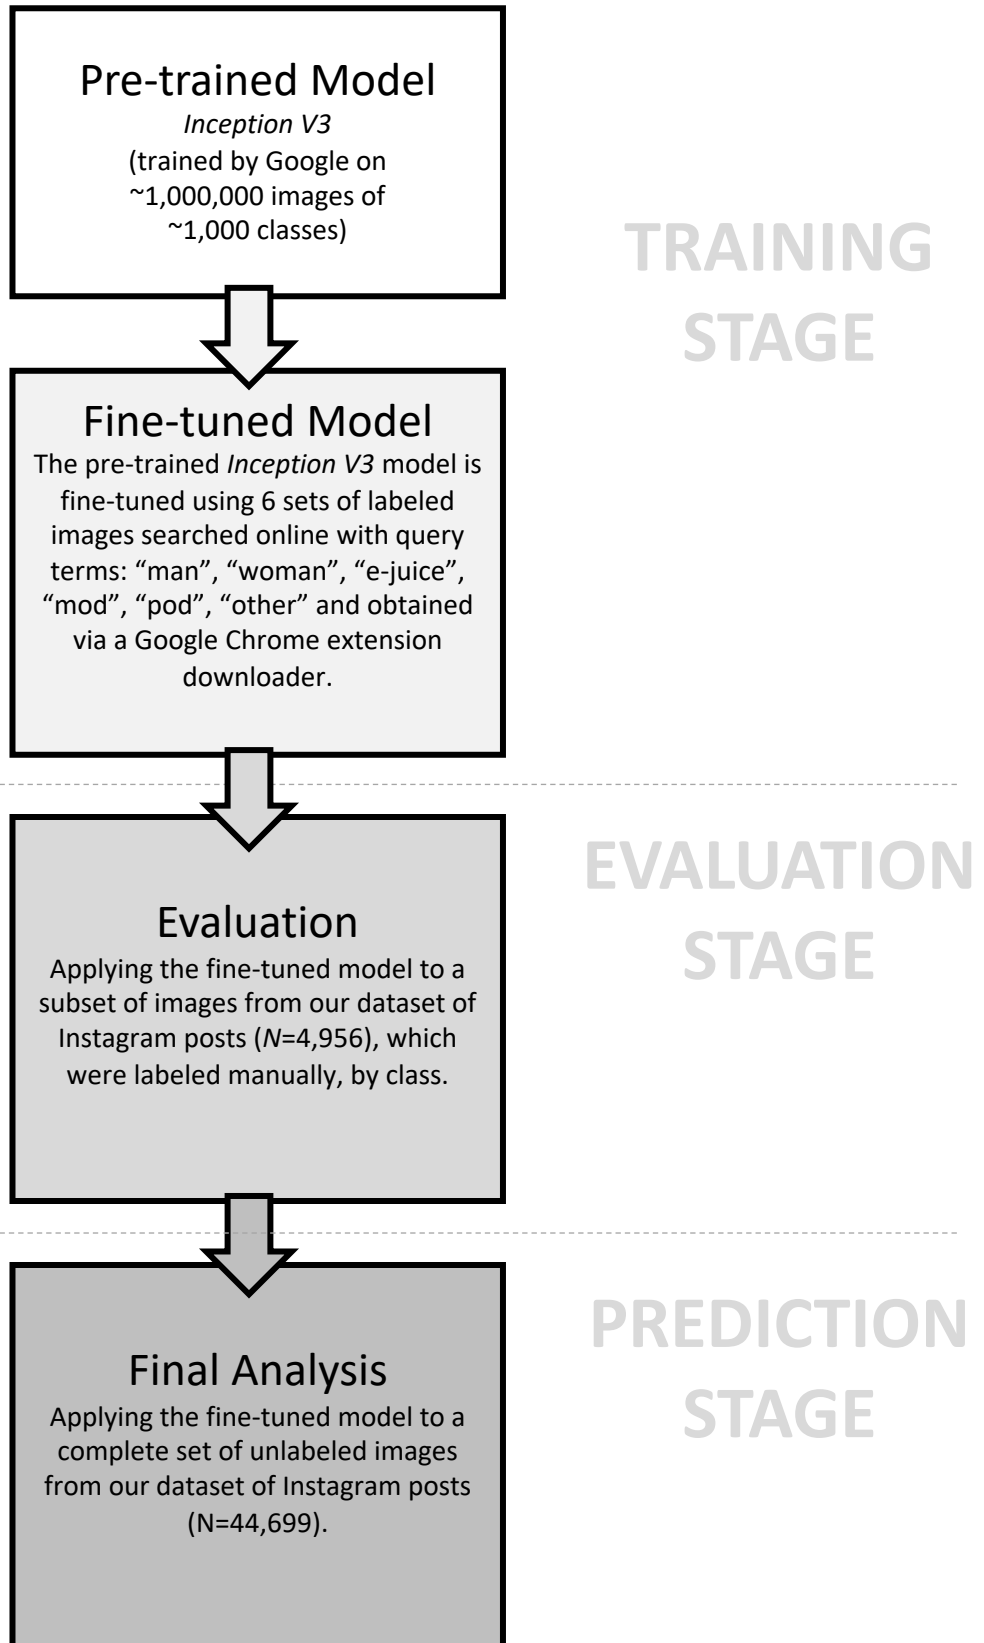

**Supplementary Figure 4.** Training, evaluation and prediction stages for deep learning image classification.
